# Supplementary material for: Folding Mechanism and Aggregation Propensity of the KH0 Domain of FMRP and Its R138Q Pathological Variant
Source: MDPI journal article supplement (doi:10.3390/ijms232012178), 2022-10-12
Supplement: s1 [file s1]

## Supplementary Materials

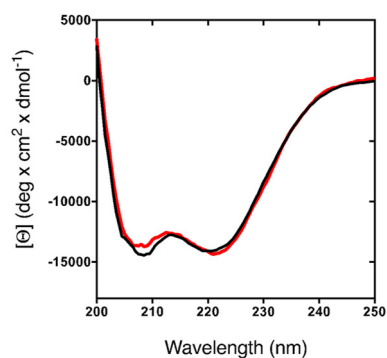

**Figure S1.** Far-UV CD spectra of KH0 (black line) and KH0-R138Q (red line).

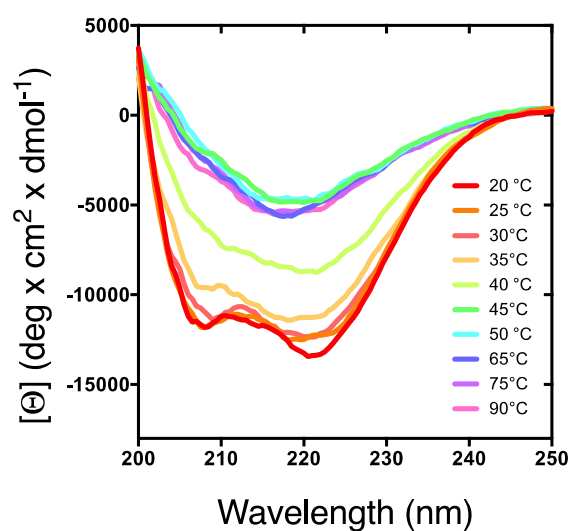

**Figure S2.** Far-UV CD spectra of KH0-R138Q in 20 mM sodium phosphate pH 7.2, 100 mM NaCl recorded at different temperatures.

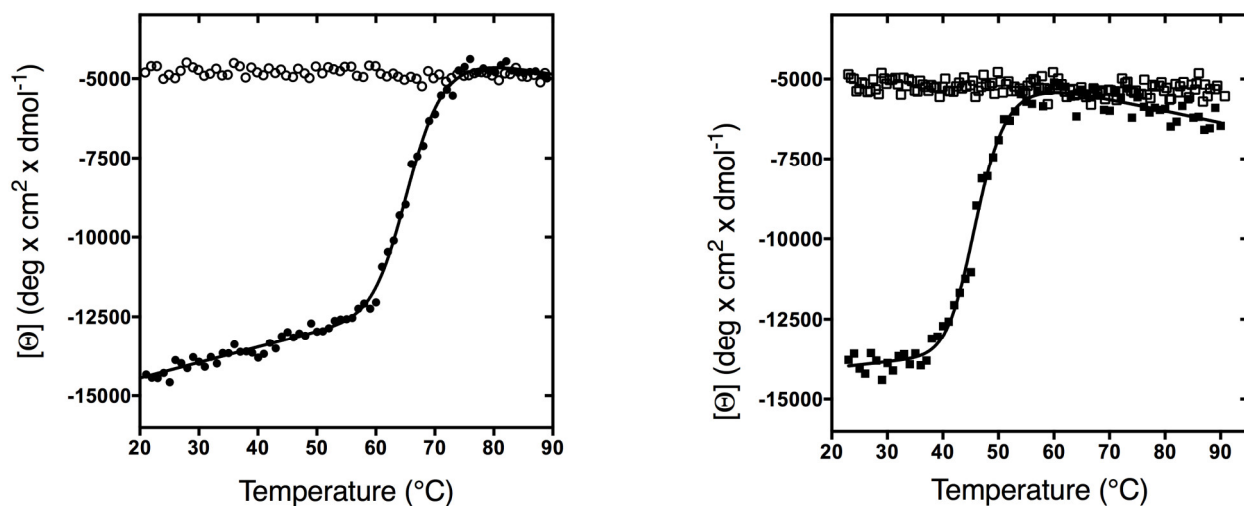

**Figure S3.** CD thermal denaturation profile (filled symbols) and reverse process (empty symbols) of KH0 (left panel) and KH0-R138Q (right panel) monitored by CD at 222 nm.

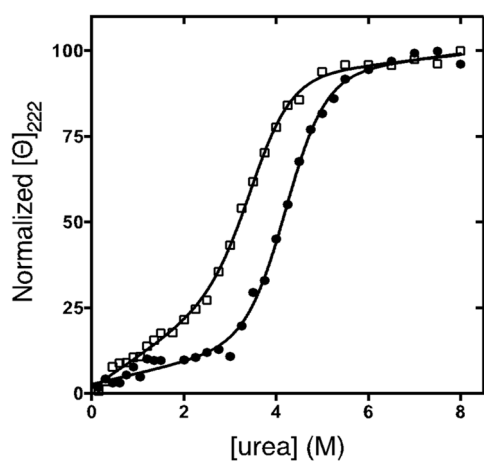

**Figure S4.** Urea-induced chemical denaturation of KH0 (Full circles) and KH0-R138Q (Empty squares) followed at 222 nm. The line is the best fit to a two-state model, sharing the  $m$  values.

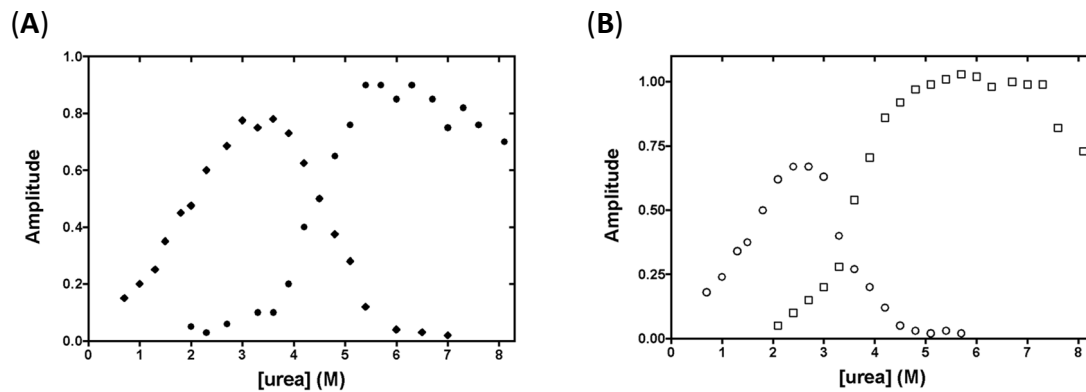

**Figure S5.** Urea dependencies of the fluorescence amplitudes for (A) W-KH0 refolding (full diamonds) and unfolding (full circles) and (B) W-KH0-R138Q refolding (empty circles) and unfolding (empty squares).

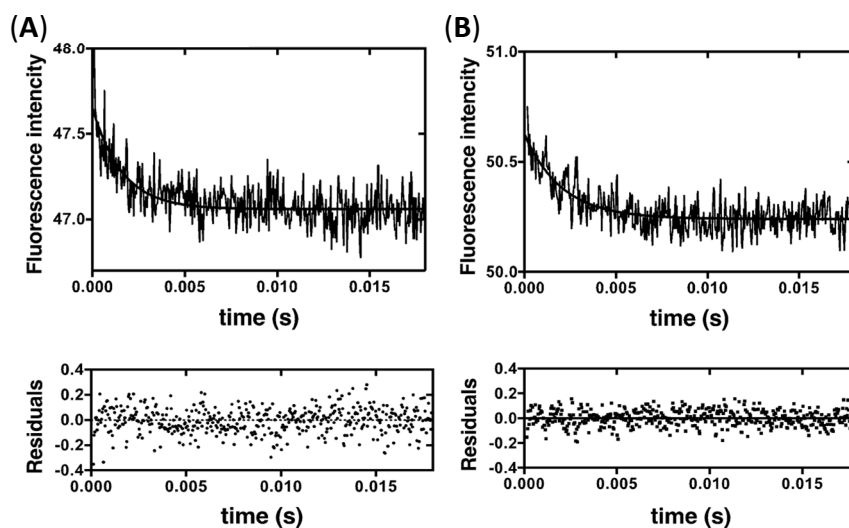

**Figure S6.** Representative T-Jump time courses recorded at 2,4 M urea for W-KH0 (A), and 1,5 M urea for W-KH0-R138Q (B), both fitted with a single exponential decay. The bottom panels display the relative residuals plots.
